# Supplementary material
Source: PubMed Central journal article supplement (PMC5115551)
Supplement: ADVS-3-0l-s001.pdf [file ADVS-3-0l-s001.pdf]

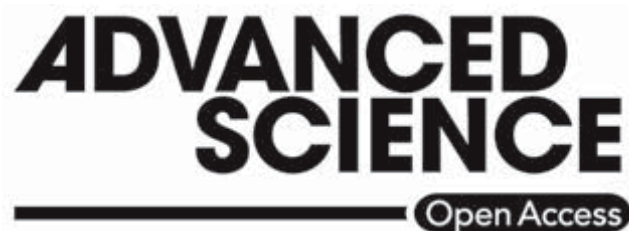

## Supporting Information

for *Adv. Sci.*, DOI: 10.1002/advs.201500299

### Ultrafast-Charging Supercapacitors Based on Corn-Like Titanium Nitride Nanostructures

*Peihua Yang, Dongliang Chao, Changrong Zhu, Xinhui Xia, Yongqi Zhang, Xingli Wang, Peng Sun, Beng Kang Tay, Ze Xiang Shen, Wenjie Mai,\* and Hong Jin Fan\**

## Supporting Information

**Ultrafast-Charging Supercapacitors Based on Corn-Like Titanium Nitride Nanostructures**

*Peihua Yang, Dongliang Chao, Changrong Zhu, Xinhui Xia, Yongqi Zhang, Xingli Wang, Peng Sun, Beng Kang Tay, Ze Xiang Shen, Wenjie Mai\* and Hong Jin Fan\**

P.H. Yang, P. Sun, Prof. W.J. Mai  
Department of Physics and Siyuan Laboratory, Jinan University, Guangzhou, Guangdong 510632, China. E-mail: [wenjjiemai@gmail.com](mailto:wenjjiemai@gmail.com)

P.H. Yang, D.L. Chao, C.R. Zhu, Dr. X.H. Xia, Y.Q. Zhang, Prof. Z. X. Shen, Prof. H. J. Fan  
School of Physical and Mathematical Sciences, Nanyang Technological University, 637371, Singapore. E-mail: [fanhj@ntu.edu.sg](mailto:fanhj@ntu.edu.sg)

X.L. Wang, Prof. B. K. Tay  
School of Electrical and Electronic Engineering, Nanyang Technological University, 639798, Singapore

P.H. Yang and D.L. Chao contributed equally to this work.

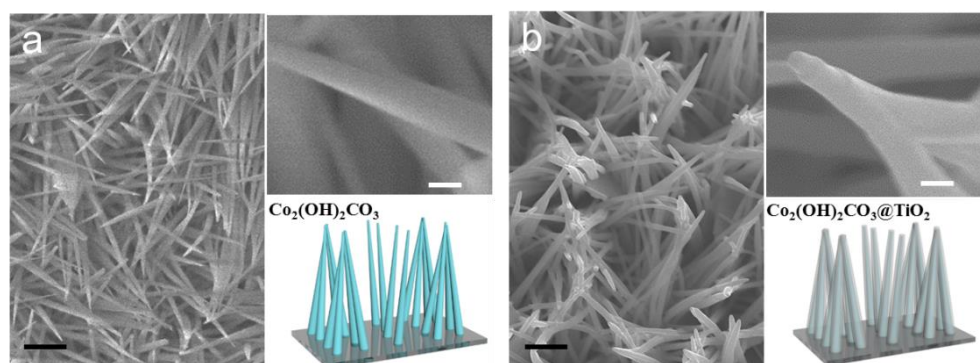

Figure S1. SEM images of  $\text{Co}_2(\text{OH})_2\text{CO}_3$  nanowires precursor and  $\text{TiO}_2$  coating. Scale bar: 1 μm in main image and 100 nm in insets.

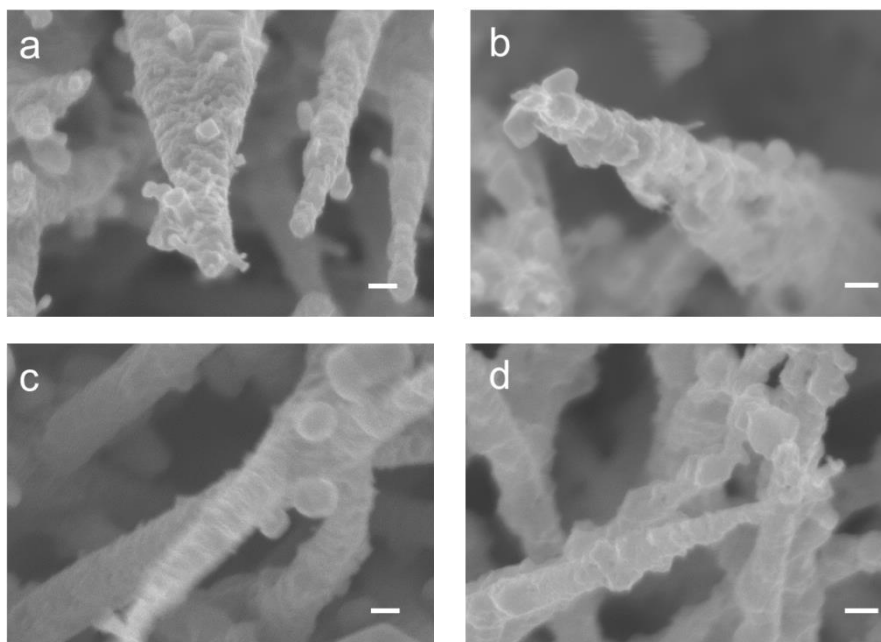

Figure S2. SEM images of (a) TiN-50 and (b) TiN-20 nanostructures on nickel plate, and (c) TiN-50 and (d) TiN-20 nanostructures on stainless steel. Scale bar: 100 nm.

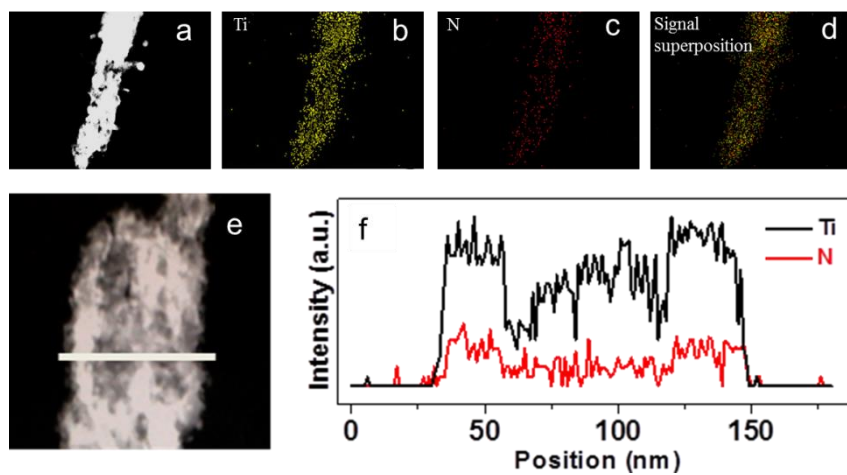

Figure S3. EDS mapping of Ti and N of TiN-20.

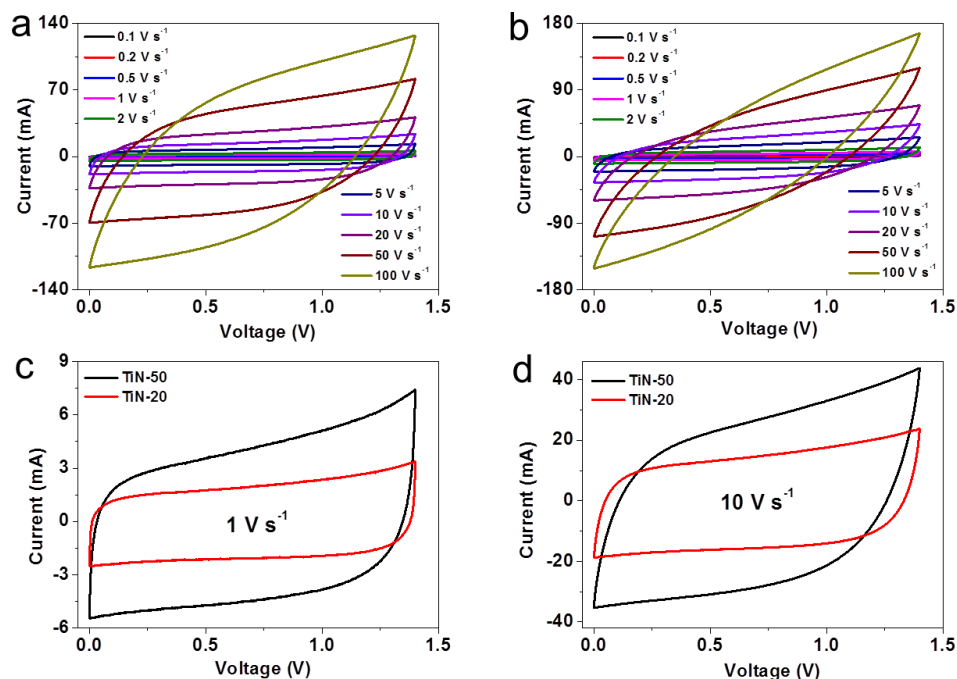

Figure S4. CV curves of (a) TiN-20 and (b) TiN-50 devices. CV curves of TiN-20 and TiN-50 at (c) 1 V s<sup>-1</sup> and (d) 10 V s<sup>-1</sup>, respectively.

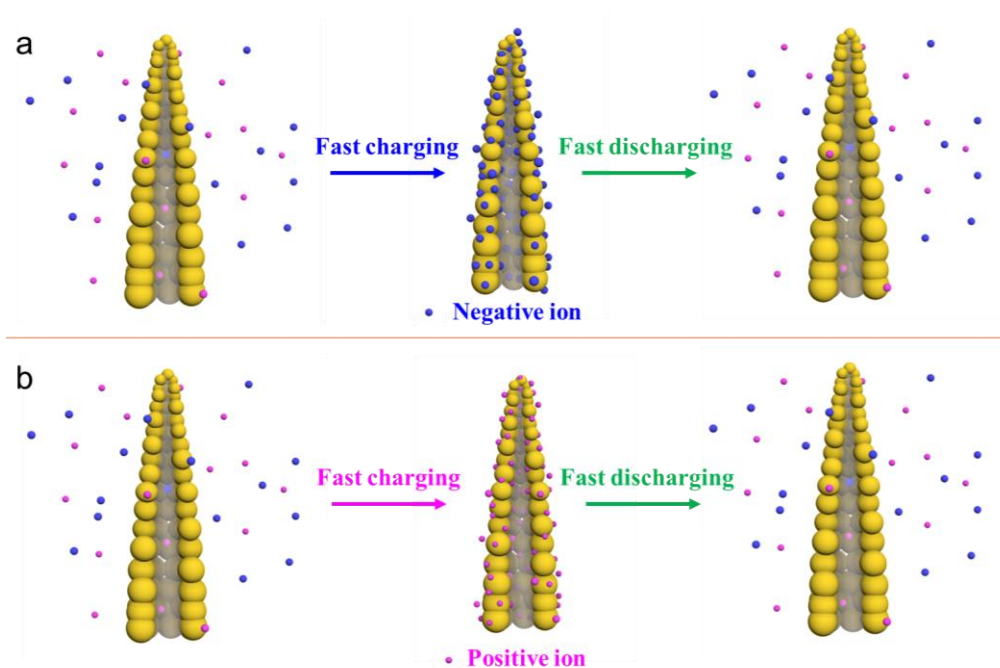

Figure S5 Schematics of the proposed charging and discharging on (a) positive and (b) negative electrodes in the TiN supercapacitors, illustrating the rapid transport of the ions along TiN surface with a short diffusion length.

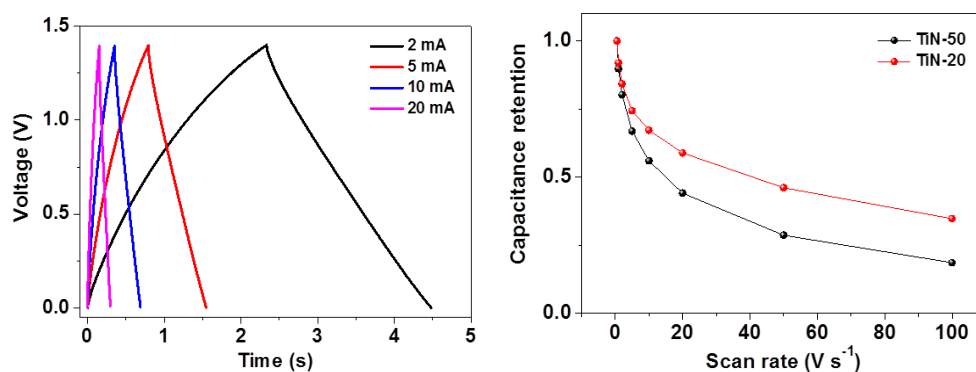

Figure S6. (a) Galvanostatic charge/discharge curves of TiN-20. (b) Capacitance retention of TiN-20 and TiN-50 devices with increasing the scan rate.

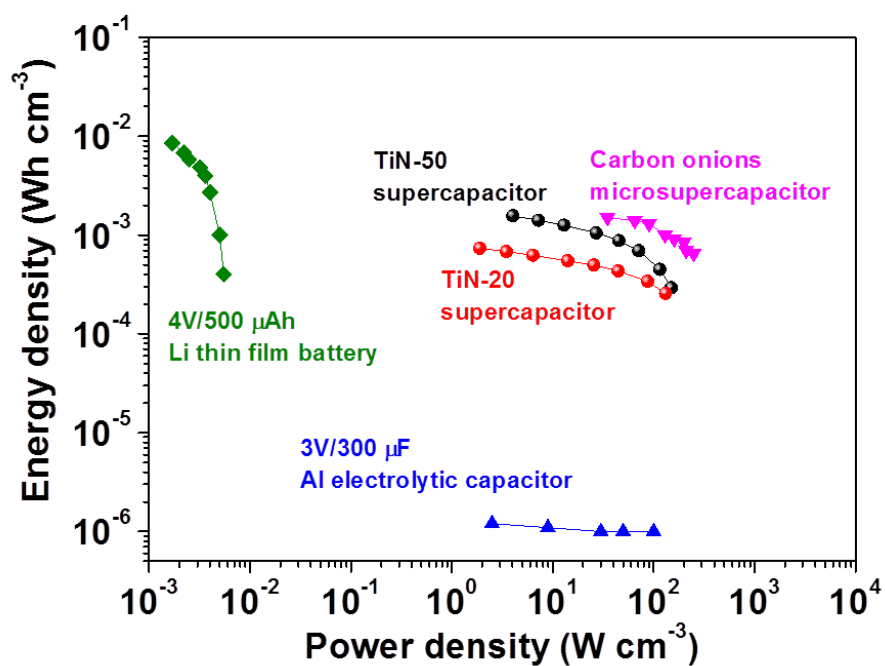

Figure S7. Ragone plots of TiN supercapacitors in comparison to commercial electrolytic capacitors, lithium thin-film batteries and carbon onions micro-supercapacitors.

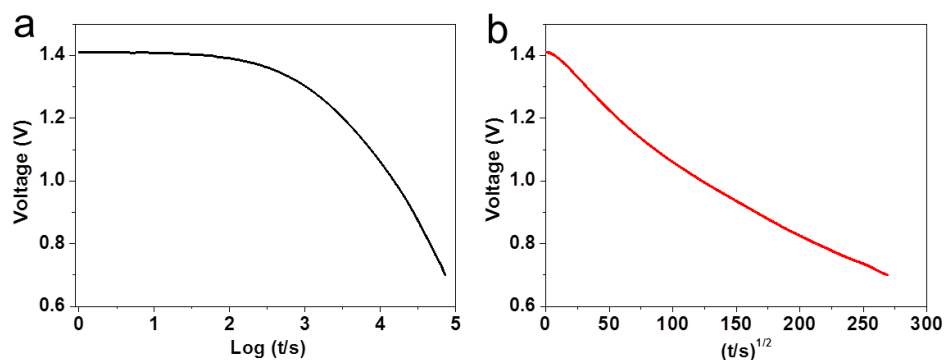

Figure S8. TiN-20 supercapacitor self-discharges in (a) logarithmic time scale and (b) square root time scale. On the basis of previous reports, the self-discharge diagnostic can be performed according to the voltage time dependency. If the voltage drops with an logarithmic law,  $U(t)$  versus  $\log(t)$ , the mechanisms are controlled by faradic self-discharge from overcharge or from the oxidation-reduction reactions of the impurities. If the voltage drops following a square root function of the time,  $U(t)$  versus  $t^{1/2}$ , the mechanisms are controlled by diffusion processes.<sup>[1-2]</sup> The results show that the self-discharge behaviors of TiN supercapacitor are more likely to be controlled by diffusion processes, just as the Maxwell commercial products (BCAP0007 and BCAP0008, described in Béguin, F.; Frackowiak, E., *Supercapacitors: Materials, Systems, and Applications*. Wiley-VCH Verlag GmbH & Co. KGaA: Weinheim, 2013, page 380-381).

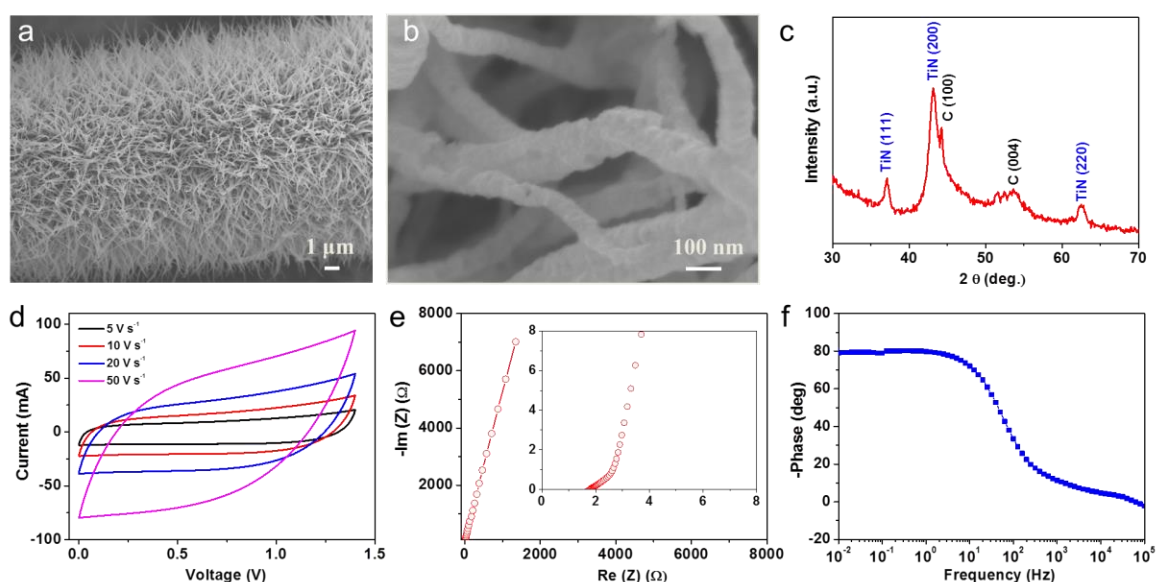

Figure S9. Demonstration of flexible supercapacitors based on TiN nanostructures grown on carbon fabric.

**Table S1.** Comparison of electrochemical performance of various supercapacitors reported in the literatures.

| Reference       | Device                                                          | Configuration       | Electrolyte                                                | Frequency at -45° (Hz) | C <sub>v</sub> at 1 Vs <sup>-1</sup> (F cm <sup>-3</sup> ) | E (mWh cm <sup>-3</sup> ) | P (W cm <sup>-3</sup> ) |
|-----------------|-----------------------------------------------------------------|---------------------|------------------------------------------------------------|------------------------|------------------------------------------------------------|---------------------------|-------------------------|
| [3]             | Nanochanneled PDDA-Graphene                                     | Micro               | H <sub>2</sub> SO <sub>4</sub> /PVA                        | 30                     | ~80                                                        | 2–6.7                     | 0.1–500                 |
| [4]             | laser-scribed graphene                                          | Micro               | H <sub>2</sub> SO <sub>4</sub> /PVA                        | 53                     | ~2.3                                                       | 0.2–0.4                   | 0.6–60                  |
| [5]             | methane plasma graphene                                         | Micro               | H <sub>2</sub> SO <sub>4</sub> /PVA                        | 3579                   | ~10                                                        | 0.14–2.5                  | 0.1–495                 |
| [6]             | Onion-like carbon                                               | Micro               | 1 mol L <sup>-1</sup> Et <sub>4</sub> NBF <sub>4</sub> /PC | 38                     | 1.3                                                        | 0.65–1.5                  | 35–250                  |
| [7]             | MnO <sub>2</sub> @carbon fiber                                  | Micro               | H <sub>3</sub> PO <sub>4</sub> /PVA                        | 45                     | ~0.8                                                       | 1.2–2.2                   | 0.008–0.4               |
| [8]             | Graphene-Bridged V <sub>2</sub> O <sub>3</sub> /VO <sub>x</sub> | Conventional        | 1 mol L <sup>-1</sup> H <sub>2</sub> SO <sub>4</sub>       | 114                    | N/A                                                        | N/A                       | N/A                     |
| [9]             | PEDOT                                                           | Micro               | 1 mol L <sup>-1</sup> H <sub>2</sub> SO <sub>4</sub>       | 400                    | ~13                                                        | 2.2                       | 3.5                     |
| [10]            | PEDOT/MWNT                                                      | Micro               | H <sub>2</sub> SO <sub>4</sub> /PVA                        | 12.5                   | 145                                                        | 0.3–1.4                   | 3–40                    |
| [11]            | MnO <sub>x</sub> /Au                                            | Micro               | H <sub>2</sub> SO <sub>4</sub> /PVA                        | 200                    | 32.8                                                       | 1–1.75                    | 0.08–3.4                |
| <b>Our work</b> | <b>TiN-20</b>                                                   | <b>Conventional</b> | <b>1 mol L<sup>-1</sup> LiClO<sub>4</sub>/PC</b>           | <b>80</b>              | <b>10.0</b>                                                | <b>0.26–0.7</b>           | <b>1.9–132</b>          |
| <b>Our work</b> | <b>TiN-50</b>                                                   | <b>Conventional</b> | <b>1 mol L<sup>-1</sup> LiClO<sub>4</sub>/PC</b>           | <b>40</b>              | <b>20.7</b>                                                | <b>0.3–1.5</b>            | <b>4–150</b>            |

## References

- [1] F. Béguin, E. Frackowiak, *Supercapacitors: Materials, Systems, and Applications*. Wiley-VCH Verlag GmbH & Co. KGaA: Weinheim, 2013.
- [2] B. E. Conway, *Electrochemical Supercapacitors: Scientific Fundamentals and Technological Applications*. Kluwer Academic / Plenum: New York, 1999.
- [3] J. Chang, S. Adhikari, T. H. Lee, B. Li, F. Yao, D. T. Pham, V. T. Le, Y. H. Lee, *Adv. Energy Mater.* **2015**, *5*, DOI: 10.1002/aenm.201500003.
- [4] M. F. El-Kady, R. B. Kaner, *Nat. Commun.* **2013**, *4*, 1475.
- [5] Z. S. Wu, K. Parvez, X. Feng, K. Müllen, *Nat. Commun.* **2013**, *4*, 2487.
- [6] D. Pech, M. Brunet, H. Durou, P. Huang, V. Mochalin, Y. Gogotsi, P.-L. Taberna, P. Simon, *Nat. Nanotechnol.* **2010**, *5*, 651.
- [7] X. Xiao, T. Li, P. Yang, Y. Gao, H. Jin, W. Ni, W. Zhan, X. Zhang, Y. Cao, J. Zhong, L. Gong, W.-C. Yen, W. Mai, J. Chen, K. Huo, Y.-L. Chueh, Z. L. Wang, J. Zhou, *ACS Nano* **2012**, *6*, 9200.
- [8] X. Pan, G. Ren, M. N. F. Hoque, S. Bayne, K. Zhu, Z. Fan, *Adv. Mater. Interfaces* **2014**, *1*, DOI: 10.1002/admi.201400398.
- [9] N. Kurra, M. K. Hota, H. N. Alshareef, *Nano Energy* **2015**, *13*, 500.
- [10] J. A. Lee, M. K. Shin, S. H. Kim, H. U. Cho, G. M. Spinks, G. G. Wallace, M. D. Lima, X. Lepró, M. E. Kozlov, R. H. Baughman, S. J. Kim, *Nat. Commun.* **2013**, *4*, 1970.
- [11] W. Si, C. Yan, Y. Chen, S. Oswald, L. Han, O. G. Schmidt, *Energy Environ. Sci.* **2013**, *6*, 3218.
